# Supplementary material for: Correction of Breech Presentation with Moxibustion and Acupuncture: A Systematic Review and Meta-Analysis
Source: MDPI journal article supplement (doi:10.3390/healthcare9060619), 2021-05-22

## Supplementary Materials:

**Table S1.** Literature search strategy

| Database | Search strategy                              |
|----------|----------------------------------------------|
| PubMed   | 1. breech                                    |
|          | 2. breech presentation [Mesh]                |
|          | 3. labor Presentation [Mesh]                 |
|          | 4. non-cephalic OR noncephalic               |
|          | 5. non-vertex OR nonvertex                   |
|          | 6. acupuncture [Mesh]                        |
|          | 7. acupuncture therapy [Mesh]                |
|          | 8. Electroacupuncture OR Electro-acupuncture |
|          | 9. acupressure                               |
|          | 10. moxibustion [Mesh]                       |
|          | 11. artemisia vulgaris                       |
|          | 12. mugwort                                  |
|          | 13. Version, Fetal [Mesh]                    |
|          | 14. 1 OR 2 OR 3 OR 4 OR 5                    |
|          | 15. 6 OR 7 OR 8 OR 9 OR 10 OR 11 OR 12       |
|          | 16. 14 AND 15                                |
|          | 17. 13 AND 14 AND 15                         |
| MEDLINE  | 1. breech.mp                                 |
|          | 2. breech presentation/                      |
|          | 3. labor Presentation/                       |
|          | 4. non-cephalic OR noncephalic               |
|          | 5. non-vertex OR nonvertex                   |
|          | 6. acupuncture/                              |
|          | 7. acupuncture therapy/                      |
|          | 8. Electroacupuncture OR Electro-acupuncture |
|          | 9. acupressure.mp                            |
|          | 10. moxibustion/                             |
|          | 11. artemisia vulgaris.mp                    |
|          | 12. mugwort.mp                               |
|          | 13. Version, Fetal/                          |
|          | 14. 1 OR 2 OR 3 OR 4 OR 5                    |
|          | 15. 6 OR 7 OR 8 OR 9 OR 10 OR 11 OR 12       |
|          | 16. 14 AND 15                                |
|          | 17. 13 AND 14 AND 15                         |
| Embase   | 1. breech/exp                                |
|          | 2. breech presentation                       |
|          | 3. labor presentation                        |
|          | 4. non-cephalic OR noncephalic               |
|          | 5. non-vertex OR nonvertex                   |
|          | 6. acupuncture/exp                           |
|          | 7. electro-acupuncture OR electroacupuncture |
|          | 8. acupressure                               |
|          | 9. moxibustion/exp                           |
|          | 10. artemisia vulgaris                       |
|          | 11. mugwort                                  |
|          | 12. fetal version/exp                        |
|          | 13. 1 OR 2 OR 3 OR 4 OR 5                    |
|          | 14. 6 OR 7 OR 8 OR 9 OR 10 OR 11             |
|          | 15. 13 AND 14                                |
|          | 16. 12 AND 13 AND 14                         |

Cochrane  
Library

1. breech
  2. MeSH descriptor: [Breech Presentation] explode all trees
  3. MeSH descriptor: [Labor Presentation] explode all trees
  4. non-cephalic OR noncephalic
  5. non-vertex OR nonvertex
  6. MeSH descriptor: [Acupuncture] explode all trees
  7. MeSH descriptor: [Acupuncture Therapy] explode all trees
  8. Electroacupuncture OR Electro-acupuncture
  9. acupressure
  10. MeSH descriptor: [Moxibustion] explode all trees
  11. artemisia vulgaris
  12. mugwort
  13. MeSH descriptor: [Version, Fetal] explode all trees
  14. 1 OR 2 OR 3 OR 4 OR 5
  15. 6 OR 7 OR 8 OR 9 OR 10 OR 11 OR 12
  16. 14 AND 15
  17. 13 AND 14 AND 15
-

**Table S2.** Summary of risk of bias assessment

| Domains     | Descriptions                                                                                                                                                                                                                                                                                                                                                                                                                                                                                                                                                                                                                                             |
|-------------|----------------------------------------------------------------------------------------------------------------------------------------------------------------------------------------------------------------------------------------------------------------------------------------------------------------------------------------------------------------------------------------------------------------------------------------------------------------------------------------------------------------------------------------------------------------------------------------------------------------------------------------------------------|
| Allocation  | All included studies mentioned randomization. Six studies reported method of randomization and allocation concealment [10, 15, 16, 25, 26, 29]. Six studies did not report how patients were randomized or how the allocation sequence was concealed [11, 17, 19, 21, 24, 27]. One study had baseline imbalances that might indicate problems with randomization process [28]. Another study reported neither randomization process nor allocation concealment process [22]. Two studies did not state how the allocation sequence was concealed and the allocation sequence was not random due to patients were assigned by date of admission [20, 23]. |
| Performance | The review authors considered that lacking of blinding may not affect the outcome, because objective outcome was addressed in these studies. Five studies managed to provide further information about co-interventions [15, 17, 25, 26, 28], and the remaining trials did not.                                                                                                                                                                                                                                                                                                                                                                          |
| Follow-up   | One study had a relatively high drop-out rate (>20%), which may influence the outcome [25].                                                                                                                                                                                                                                                                                                                                                                                                                                                                                                                                                              |
| Measurement | One trial did not state how fetal malposition was assessed [22], and the others reported how the outcome was measured. The review authors judged that whether outcome assessors were blind or not, the outcome are not likely to be influenced.                                                                                                                                                                                                                                                                                                                                                                                                          |
| Reporting   | Three trials reported study protocol [10, 15, 25], and the remaining trials failed to report protocols.                                                                                                                                                                                                                                                                                                                                                                                                                                                                                                                                                  |

**Figure S1.** Forest plot of comparison: Moxibustion versus Control;  
Outcome: Preterm delivery & Premature rupture of membranes.

### Preterm delivery:

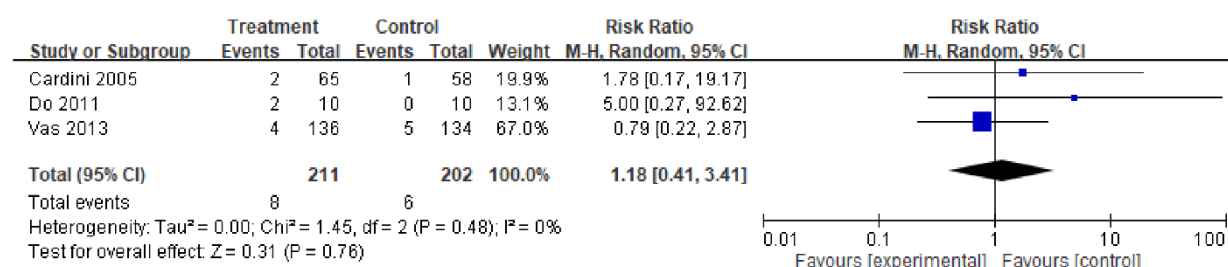

### Premature rupture of membranes:

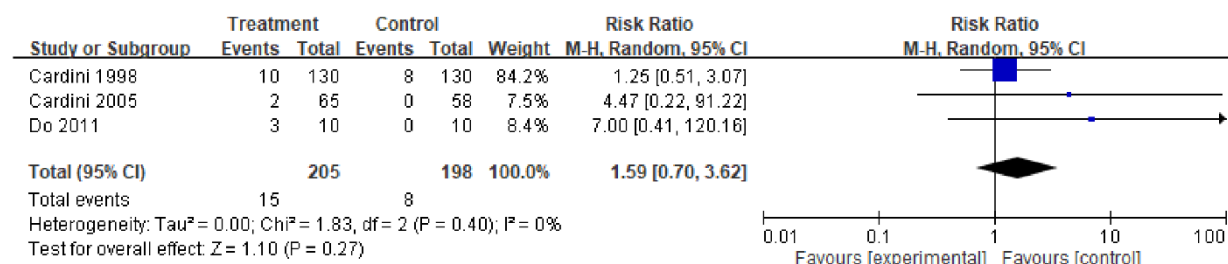

Supplement: s1 [file s1]
